# Supplementary material for: Acute oral toxicity of pesticides for the control of the invasive yellow-legged hornet Vespa velutina nigrithorax (Hymenoptera: Vespidae): a step towards effective management
Source: Research Square preprint supplement (doi:10.21203/rs.3.rs-7744059/v1), 2025-10-20
Supplement: Supplementary file 1 [file SupplementaryTable1.docx]

**Supplementary Table 1**. Description of the sites where the *Vespa velutina nigrithorax* nests for adult collection were located.

| **Nest** | **Date** | **Location** | **Geographical coordinates** |
| --- | --- | --- | --- |
| 1 | 02/IX/2024 | Portugal, Lousã | 40°10'58.2"N 8°15'47.7"W |
| 2 | 04/IX/2024 09/IX/2024 | Portugal, Lousã | 40°09'15.3"N 8°11'25.0"W |
| 3 | 23/IX/2024 | Portugal, Coimbra | 40°12'30.0"N 8°28'35.8"W |
| 4 | 30/IX/2024 | Portugal, Coimbra | 40°07'54.4"N 8°27'49.1"W |
| 5 | 02/X/2024 | Portugal, Lousã | 40°08'24.4"N 8°12'23.0"W |
| 6 | 07/X/2024 | Portugal, Lousã | 40°08'27.2"N 8°12'33.3"W |
| 7 | 09/X/2024 | Portugal, Coimbra | 40°11'46.2"N 8°29'55.7"W |
| 8 | 14/X/2024 | Portugal, Lousã | 40°07'07.7"N 8°15'00.2"W |
| 9 | 16/X/2024 | Portugal, Lousã | 40°06'12.8"N 8°17'38.2"W |
