# Supplementary material for: Acute oral toxicity of pesticides for the control of the invasive yellow-legged hornet Vespa velutina nigrithorax (Hymenoptera: Vespidae): a step towards effective management
Source: Research Square preprint supplement (doi:10.21203/rs.3.rs-7744059/v1), 2025-10-20
Supplement: Supplementary file 5 [file SupplementaryTable5.docx]

**Supplementary Table 5.** Mortality data (Nº individuals dead) of *Vespa velutina* in the 5 nests collected for each concentration of Pirecris® over the time observed during the test. These values were used for calculations in Priprobit and to generate mortality curves. a.i.: active ingredient.

|  |  |  |  | **Nº individuals dead** | | | | |
| --- | --- | --- | --- | --- | --- | --- | --- | --- |
| **Nest** | **Treatment** | **Concentration mg a.i/ml** | **N** | **24h** | **48h** | **72h** | **96h** | **Total** |
| 1 | Control | 0 | 10 | 0 | 0 | 0 | 3 | 3 |
| 1 | C1 | 0.037109375 | 10 | 0 | 0 | 2 | 0 | 2 |
| 1 | C2 | 0.07421875 | 10 | 1 | 0 | 4 | 0 | 5 |
| 1 | C3 | 0.1484375 | 10 | 2 | 1 | 3 | 0 | 6 |
| 1 | C4 | 0.296875 | 10 | 0 | 1 | 4 | 0 | 5 |
| 1 | C5 | 0.59375 | 10 | 2 | 0 | 1 | 0 | 3 |
| 1 | C6 | 1.1875 | 10 | 2 | 2 | 2 | 0 | 6 |
| 1 | C7 | 2.375 | 10 | 8 | 2 | 0 | 0 | 10 |
| 1 | C8 | 4.75 | 10 | 10 | 0 | 0 | 0 | 10 |
| 2 | Control | 0 | 10 | 1 | 0 | 2 | 3 | 6 |
| 2 | C1 | 0.037109375 | 10 | 0 | 0 | 2 | 0 | 2 |
| 2 | C2 | 0.07421875 | 10 | 2 | 0 | 0 | 0 | 2 |
| 2 | C3 | 0.1484375 | 10 | 0 | 1 | 1 | 0 | 2 |
| 2 | C4 | 0.296875 | 10 | 0 | 2 | 0 | 0 | 2 |
| 2 | C5 | 0.59375 | 10 | 2 | 2 | 1 | 0 | 5 |
| 2 | C6 | 1.1875 | 10 | 2 | 3 | 1 | 0 | 6 |
| 2 | C7 | 2.375 | 10 | 4 | 1 | 3 | 0 | 8 |
| 2 | C8 | 4.75 | 10 | 10 | 0 | 0 | 0 | 10 |
| 3 | Control | 0 | 10 | 0 | 0 | 0 | 0 | 0 |
| 3 | C1 | 0.037109375 | 10 | 0 | 0 | 2 | 0 | 2 |
| 3 | C2 | 0.07421875 | 10 | 0 | 1 | 0 | 0 | 1 |
| 3 | C3 | 0.1484375 | 10 | 0 | 0 | 0 | 0 | 0 |
| 3 | C4 | 0.296875 | 10 | 0 | 1 | 1 | 0 | 2 |
| 3 | C5 | 0.59375 | 10 | 5 | 2 | 0 | 0 | 7 |
| 3 | C6 | 1.1875 | 10 | 2 | 0 | 1 | 0 | 3 |
| 3 | C7 | 2.375 | 10 | 5 | 1 | 0 | 0 | 6 |
| 3 | C8 | 4.75 | 10 | 9 | 0 | 0 | 0 | 9 |
| 4 | Control | 0 | 10 | 0 | 1 | 0 | 1 | 2 |
| 4 | C1 | 0.037109375 | 10 | 0 | 1 |  | 0 | 1 |
| 4 | C2 | 0.07421875 | 10 | 0 | 0 | 2 | 0 | 2 |
| 4 | C3 | 0.1484375 | 10 | 1 | 0 | 1 | 0 | 2 |
| 4 | C4 | 0.296875 | 10 | 0 | 0 | 1 | 0 | 1 |
| 4 | C5 | 0.59375 | 10 | 1 | 1 | 2 | 0 | 4 |
| 4 | C6 | 1.1875 | 10 | 2 | 0 | 1 | 0 | 3 |
| 4 | C7 | 2.375 | 10 | 6 | 2 | 0 | 0 | 8 |
| 4 | C8 | 4.75 | 10 | 10 | 0 | 0 | 0 | 10 |
| 5 | Control | 0 | 10 | 0 | 0 | 0 | 2 | 2 |
| 5 | C1 | 0.037109375 | 10 | 0 | 0 | 0 | 0 | 0 |
| 5 | C2 | 0.07421875 | 10 | 0 | 1 | 1 | 0 | 2 |
| 5 | C3 | 0.1484375 | 10 | 0 | 0 | 1 | 0 | 1 |
| 5 | C4 | 0.296875 | 10 | 0 | 1 | 3 | 0 | 4 |
| 5 | C5 | 0.59375 | 10 | 1 | 0 | 2 | 0 | 3 |
| 5 | C6 | 1.1875 | 10 | 3 | 1 | 2 | 0 | 6 |
| 5 | C7 | 2.375 | 10 | 6 | 0 | 1 | 0 | 7 |
| 5 | C8 | 4.75 | 10 | 9 | 0 | 0 | 0 | 9 |
